# Supplementary material
Source: MDPI journal article supplement (https://www.mdpi.com/2304-6767/11/2/55)
Supplement: s1 [file s1]

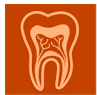

**Supplementary Materials:** The following supporting information can be downloaded at: [www.mdpi.com/xxx/s1](http://www.mdpi.com/xxx/s1)

Table S1-1. Used search terms

Table S1-2. Used electronic databases

Table S1-3. Sources for the hand search until January, 15<sup>th</sup> 2014

Table S2-1. Risk of bias for RCTS with intention-to-treat based on the Cochrane library

Table S2-2. Risk of bias for RCTS with pre-protocol based on the Cochrane library

Table S3. Risk of bias for non-randomized studies of interventions based on the Cochrane library

Table S4-1. Summary of the results of the included studies: clasp-retained RPDs

Table S4-2. Summary of the results of the included studies: attachment-retained RPDs

Table S4-3. Summary of the results of the included studies: conical double-crown-retained RPDs

Table S4-4. Summary of the results of the included studies: electroplated double-crown-retained RPDs

Table S4-5. Summary of the results of the included studies: double-crown-retained RPDs

Table S4-6. Summary of the results of the included studies: other RPDs (bars, etc.)

**Table S1.** Used search terms .

| Number | Used search terms                                                                                                                                                                                                                                                                                                                          |
|--------|--------------------------------------------------------------------------------------------------------------------------------------------------------------------------------------------------------------------------------------------------------------------------------------------------------------------------------------------|
| 1      | Denture, Partial, Removable [MeSH Terms] AND (Short* dent* arch*)                                                                                                                                                                                                                                                                          |
| 2      | Denture, Partial, Fixed [MeSH Terms] AND (Short* dent* arch*)                                                                                                                                                                                                                                                                              |
| 3      | Denture, Partial, Fixed [MeSH Terms] AND (clinical AND (trial OR study))                                                                                                                                                                                                                                                                   |
| 4      | Denture, Partial, Removable [MeSH Terms] AND (clinical AND (trial OR study))                                                                                                                                                                                                                                                               |
| 5      | Denture, Partial, Fixed [MeSH Terms] AND (cantil* OR extens*)                                                                                                                                                                                                                                                                              |
| 6      | Denture, Partial, Fixed [MeSH Terms] AND “Dental Prosthesis, Implant-Supported” [Mesh] AND (teeth OR tooth OR molar OR premolar) AND (missing OR posterior)                                                                                                                                                                                |
| 7      | Denture, Partial, Fixed [MeSH Terms] AND “Dental Prosthesis, Implant-Supported” Mesh] AND (clinical AND (trial OR study))                                                                                                                                                                                                                  |
| 8      | Denture, Partial, Fixed [MeSH Terms] AND Dental Implants [MeSH Terms] AND (clinical AND (trial OR study))                                                                                                                                                                                                                                  |
| 9      | Denture, Partial, Fixed [MeSH Terms] AND Dental Implants [MeSH Terms] AND (teeth OR tooth OR molar OR premolar) AND (missing OR posterior)                                                                                                                                                                                                 |
| 10     | “Denture, Partial, Removable” [MeSH Terms] AND “Dental Prosthesis, Implant-Supported” [MeSH Terms]                                                                                                                                                                                                                                         |
| 11     | “Denture, Partial, Removable” [MeSH Terms] AND “Dental Implants” [Mesh]                                                                                                                                                                                                                                                                    |
| 12     | ((teeth OR tooth OR molar OR premolar) AND (missing OR posterior)) AND (clinical AND (trial OR study))                                                                                                                                                                                                                                     |
| 13     | ((teeth OR tooth OR molar OR premolar) AND (missing OR posterior)) AND ((Denture, Partial, Fixed [MeSH Terms]) OR (Denture, Partial, Removable [MeSH Terms]) OR (Dental Prosthesis, Implant-Supported [MeSH Terms]) OR (Dental Implants [MeSH Terms]) OR (Short* dent* arch*) OR (cantil* OR extens*)) AND (clinical AND (trial OR study)) |
| 14     | ((Removable AND partial AND denture) AND (trial OR study))                                                                                                                                                                                                                                                                                 |

**Table S1.** Used electronic databases .

| Number | Used electronic databases   |
|--------|-----------------------------|
| 1      | MEDLINE/PubMed              |
| 2      | EMBASE/Ovid                 |
| 3      | BIOSIS/Ovid                 |
| 4      | SciSearch/DIMDI             |
| 5      | Cochrane/Cochrane           |
| 6      | FIZ Technik Web/FIZ Technik |

**Table S1.** Sources for the hand search until January, 15<sup>th</sup> 2014.

| Number | Sources for the hand search until January, 15 <sup>th</sup> 2014                                                                                                                               |
|--------|------------------------------------------------------------------------------------------------------------------------------------------------------------------------------------------------|
| 1      | Clinical Oral Investigations, 1997–date <a href="http://link.springer.com/journal/volumesAndIssues/784">http://link.springer.com/journal/volumesAndIssues/784</a>                              |
| 2      | The International Journal of Prosthodontics, 1988–date <a href="http://www.quintpub.com/journals/ijp/gp.php?journal_name=ijp">http://www.quintpub.com/journals/ijp/gp.php?journal_name=ijp</a> |
| 3      | The Journal of Prosthetic Dentistry, 1950–date <a href="http://www.journals.elsevierhealth.com/periodicals/ympr/issues">http://www.journals.elsevierhealth.com/periodicals/ympr/issues</a>     |
| 4      | Deutsche Zahnärztliche Zeitschrift, 1945–date (also available online from 2001 onwards) <a href="http://www.zahnheilkunde.de">www.zahnheilkunde.de</a> &                                       |
| 5      | Schweizer Monatsschrift für Zahnmedizin (Swiss Dental Journal), 1987–date (also available online from 1997 onward) <a href="http://www.sso.ch">www.sso.ch</a>                                  |
| 6      | Journal of Dentistry, 1972–date <a href="http://www.jodjournal.com/issues">www.jodjournal.com/issues</a>                                                                                       |
| 7      | Journal of Dental Research, 1919–date <a href="http://jdr.sagepub.com/content/by/year">http://jdr.sagepub.com/content/by/year</a>                                                              |

**Table S2.** Risk of bias for RCTS with intention-to-treat based on the Cochrane library (based on Sterne JAC, Savović J, Page MJ, Elbers RG, Blencowe NS, Boutron I, Cates CJ, Cheng H-Y, Corbett MS, Eldridge SM, Hernán MA, Hopewell S, Hróbjartsson A, Junqueira DR, Jüni P, Kirkham JJ, Lasserson T, Li T, McAleenan A, Reeves BC, Shepperd S, Shrier I, Stewart LA, Tilling K, White IR, Whiting PF, Higgins JPT. RoB 2: a revised tool for assessing risk of bias in randomised trials. *BMJ* 2019; 366: 14898).

| <u>Author, year</u>   | <u>Weight</u> | <u>D1</u> | <u>D2</u> | <u>D3</u> | <u>D4</u> | <u>D5</u> | <u>Overall</u> |  |    |                                            |
|-----------------------|---------------|-----------|-----------|-----------|-----------|-----------|----------------|--|----|--------------------------------------------|
| Budtz-Jorgensen, 1987 | 1             | !         | !         | +         | +         | !         | !              |  | +  | Low risk                                   |
| Budtz-Jorgensen, 1990 | 1             | !         | !         | +         | +         | !         | !              |  | !  | Some concerns                              |
| Stober, 2012          | 1             | !         | !         | +         | +         | !         | !              |  |    | High risk                                  |
| Stober, 2015          | 1             | !         | !         | +         | +         | !         | !              |  |    |                                            |
| Wolfart, 2012         | 1             | +         | !         | +         | +         | !         | !              |  | D1 | Randomisation process                      |
|                       |               |           |           |           |           |           |                |  | D2 | Deviations from the intended interventions |
|                       |               |           |           |           |           |           |                |  | D3 | Missing outcome data                       |
|                       |               |           |           |           |           |           |                |  | D4 | Measurement of the outcome                 |
|                       |               |           |           |           |           |           |                |  | D5 | Selection of the reported result           |

**Table S2.** Risk of bias for RCTS with pre-protocol based on the Cochrane library (based on Sterne JAC, Savović J, Page MJ, Elbers RG, Blencowe NS, Boutron I, Cates CJ, Cheng H-Y, Corbett MS, Eldridge SM, Hernán MA, Hopewell S, Hróbjartsson A, Junqueira DR, Jüni P, Kirkham JJ, Lasserson T, Li T, McAleenan A, Reeves BC, Shepperd S, Shrier I, Stewart LA, Tilling K, White IR, Whiting PF, Higgins JPT. RoB 2: a revised tool for assessing risk of bias in randomised trials. *BMJ* 2019; 366: l4898).

| Per-<br>proto-<br>col | Author, year         | Weight | D1 | D2 | D3 | D4 | D5 | Overall |  |    |                                                 |
|-----------------------|----------------------|--------|----|----|----|----|----|---------|--|----|-------------------------------------------------|
|                       | Au, 2000             | 1      | !  | !  | +  | +  | !  | !       |  | +  | Low risk                                        |
|                       | Kapur, 1989, Part II | 1      | !  | +  | +  | +  | !  | !       |  | !  | Some concerns                                   |
|                       | Kapur, 1994, Part I  | 1      | !  | +  | +  | +  | !  | !       |  |    | High risk                                       |
|                       | Schwindling, 2017    | 1      | +  | +  | +  | !  | !  | !       |  |    |                                                 |
|                       | Thomason, 2007       | 1      | !  | !  | +  | +  | !  | !       |  | D1 | Randomisation process                           |
|                       |                      |        |    |    |    |    |    |         |  | D2 | Deviations from the intended in-<br>terventions |
|                       |                      |        |    |    |    |    |    |         |  | D3 | Missing outcome data                            |
|                       |                      |        |    |    |    |    |    |         |  | D4 | Measurement of the outcome                      |
|                       |                      |        |    |    |    |    |    |         |  | D5 | Selection of the reported result                |

**Table S3.** Risk of bias for non-randomized studies of interventions based on the Cochrane library (based on Sterne JAC, Hernán MA, Reeves BC, Savović J, Berkman ND, Viswanathan M, Henry D, Altman DG, Ansari MT, Boutron I, Carpenter JR, Chan AW, Churchill R, Deeks JJ, Hróbjartsson A, Kirkham J, Jüni P, Loke YK, Pigott TD, Ramsay CR, Regidor D, Rothstein HR, Sandhu L, Santaguida PL, Schünemann HJ, Shea B, Shrier I, Tugwell P, Turner L, Valentine JC, Waddington H, Waters E, Wells GA, Whiting PF, Higgins JPT. [ROBINS-I: a tool for assessing risk of bias in non-randomized studies of interventions](#). BMJ 2016; 355; i4919; doi: 10.1136/bmj.i4919.).

| Auth<br>or,<br>year      | Bias due<br>to<br>confound<br>ing | Bias in<br>selection of<br>participants<br>into the study | Bias in<br>classification<br>of<br>interventions | Bias due to<br>deviations from<br>intended<br>interventions | Bias due<br>to<br>missing<br>data | Bias in<br>measurement<br>of outcomes | Bias in<br>selection of<br>the reported<br>result | Overall<br>bias |
|--------------------------|-----------------------------------|-----------------------------------------------------------|--------------------------------------------------|-------------------------------------------------------------|-----------------------------------|---------------------------------------|---------------------------------------------------|-----------------|
| Al-<br>Ima<br>m,<br>2016 | Moderate                          | Low                                                       | Low                                              | Low                                                         | Moderate                          | Low                                   | Low                                               | Moderate        |
| Behr,<br>2000            | Moderate                          | Moderate                                                  | Low                                              | Low                                                         | Low                               | Low                                   | Low                                               | Moderate        |
| Behr,<br>2009            | Moderate                          | Moderate                                                  | Low                                              | Low                                                         | Low                               | Low                                   | Low                                               | Moderate        |
| Behr,<br>2012            | Moderate                          | Moderate                                                  | Low                                              | Low                                                         | Low                               | Low                                   | Low                                               | Moderate        |
| Berg<br>man,<br>1971     | Moderate                          | Low                                                       | Low                                              | Low                                                         | Low                               | Low                                   | Low                                               | Moderate        |
| Berg<br>man,<br>1977     | Moderate                          | Low                                                       | Low                                              | Low                                                         | Moderate                          | Low                                   | Low                                               | Moderate        |
| Berg<br>man,<br>1982     | Moderate                          | Low                                                       | Low                                              | Low                                                         | Low                               | Low                                   | Low                                               | Moderate        |
| Berg<br>mann<br>, 1996   | Moderate                          | Low                                                       | Low                                              | Low                                                         | Moderate                          | Low                                   | Low                                               | Moderate        |
| Eric<br>son,<br>1990     | Moderate                          | Low                                                       | Low                                              | Low                                                         | Moderate                          | Low                                   | Low                                               | Moderate        |

|                    |          |          |     |     |          |     |     |          |
|--------------------|----------|----------|-----|-----|----------|-----|-----|----------|
| Hahn<br>el,2012    | Moderate | Low      | Low | Low | Moderate | Low | Low | Moderate |
| Heyd<br>ecke, 2003 | Moderate | Moderate | Low | Low | Moderate | Low | Low | Moderate |
| Ishid<br>a, 2016   | Moderate | Low      | Low | Low | Moderate | Low | Low | Moderate |
| Kuro<br>saki, 2021 | Moderate | Moderate | Low | Low | Moderate | Low | Low | Moderate |
| Mock<br>, 2005     | Moderate | Low      | Low | Low | Low      | Low | Low | Moderate |
| Nick<br>enig, 1995 | Moderate | Moderate | Low | Low | Low      | Low | Low | Moderate |
| Nisse<br>r, 2022   | Moderate | Moderate | Low | Low | Low      | Low | Low | Moderate |
| Pihlaj<br>a, 2015  | Moderate | Moderate | Low | Low | Low      | Low | Low | Moderate |
| Reh<br>mann, 2006  | Moderate | Moderate | Low | Low | Low      | Low | Low | Moderate |
| Schm<br>itt, 2011  | Moderate | Low      | Low | Low | Low      | Low | Low | Moderate |
| Schol<br>z, 2010   | Moderate | Low      | Low | Low | Low      | Low | Low | Moderate |

|                           |          |          |     |     |          |     |     |          |
|---------------------------|----------|----------|-----|-----|----------|-----|-----|----------|
| Schulte, 1980             | Moderate | Moderate | Low | Low | Moderate | Low | Low | Moderate |
| Schwindling, 2014         | Moderate | Moderate | Low | Low | Moderate | Low | Low | Moderate |
| Steiglmann, 2012          | Moderate | Moderate | Low | Low | Low      | Low | Low | Moderate |
| Stober, 2020              | Moderate | Low      | Low | Low | Low      | Low | Low | Moderate |
| Vanzeveren, Part I, 2003  | Moderate | Moderate | Low | Low | Moderate | Low | Low | Moderate |
| Vanzeveren, Part II, 2003 | Moderate | Moderate | Low | Low | Moderate | Low | Low | Moderate |
| Vermeylen, 1996           | Moderate | Moderate | Low | Low | Moderate | Low | Low | Moderate |
| Wagner, 2000              | Moderate | Moderate | Low | Low | Moderate | Low | Low | Moderate |
| Wenzel, 2001              | Moderate | Moderate | Low | Low | Low      | Low | Low | Moderate |

|                    |          |          |     |     |          |     |     |          |
|--------------------|----------|----------|-----|-----|----------|-----|-----|----------|
| Widb<br>om, 2004   | Moderate | Moderate | Low | Low | Moderate | Low | Low | Moderate |
| Wöst<br>mann, 2007 | Moderate | Moderate | Low | Low | Moderate | Low | Low | Moderate |
| Yoshi<br>no, 2019  | Moderate | Moderate | Low | Low | Low      | Low | Low | Moderate |
| Zierd<br>en, 2018  | Moderate | Moderate | Low | Low | Moderate | Low | Low | Moderate |

**Table S4.** Summary of the results of the included studies: clasp-retained RPDs.

| Author, year      | Retention of prosthesis                                 | Retention loss of anchor crowns (decementation) | Fracture of the framework (including the anchorage elements and their repair)                                                                  | Fracture/repair of denture teeth or veneering                                                | Fracture/repair of acrylic denture base/saddles                                 | Relining/re-basing                     | Other failures/complications                                                                                                                                                                                                                        |
|-------------------|---------------------------------------------------------|-------------------------------------------------|------------------------------------------------------------------------------------------------------------------------------------------------|----------------------------------------------------------------------------------------------|---------------------------------------------------------------------------------|----------------------------------------|-----------------------------------------------------------------------------------------------------------------------------------------------------------------------------------------------------------------------------------------------------|
| Al-Imam, 2016 [5] |                                                         |                                                 | Fracture of clasps: 3 (4.6%) of patients                                                                                                       |                                                                                              | Fracture of acrylic: 1 (1.5%) of patients                                       |                                        | Ill-fitting protheses in 16 (24.6%) patients (lack of differentiation)                                                                                                                                                                              |
| Au, 2000 [6]      | Inadequate retention: 3 (10.7%) of cobalt-chromium RPDs |                                                 | Fracture of occlusal rest: 1 (5.3%) of Titanium-RPDs; 1 (3.6%) of Cobalt-chromium RPDs. Fracture of minor connector: 1 (5.3%) of Titanium-RPDs | Denture tooth debonding: 1 (5.3%) of Titanium-RPDs, 1 (3.6%) of Cobalt-chromium RPDs         | Porosity of acrylic: 1 (5.3%) of Titanium-RPD, 1 (3.6%) of Cobalt-chromium RPDs |                                        | Retainer not connecting to tooth: 2 (10.5%) of Titanium-RPDs, 6 (21.4%) of Cobalt-chromium-RPDs. Poor clinical fit: 1 (5.3%) of Titanium-RPDs. High occlusion: 1 (3.6%) of Cobalt-chromium-RPDs. Out of occlusion: 1 (3.6%) of Cobalt-chromium-RPDs |
| Behr, 2012 [9]    |                                                         |                                                 | Clasps fracture: 28 (16.1%) of RPDs. Fracture of major connector: 9 (5.1%) of RPDs. Fracture of minor connector: 6 (3.4%) of RPDs              | Loss of artificial acrylic resin teeth: 8 (4.6%) of RPDs. Considerable wear of acrylic resin |                                                                                 | Relining necessary: 32 (18.3%) of RPDs |                                                                                                                                                                                                                                                     |

|                     |                                                                                          |                                                                                                                                                                                                                                                                                                                                                                      |                                                                                                                                     |                                                                                                                  |
|---------------------|------------------------------------------------------------------------------------------|----------------------------------------------------------------------------------------------------------------------------------------------------------------------------------------------------------------------------------------------------------------------------------------------------------------------------------------------------------------------|-------------------------------------------------------------------------------------------------------------------------------------|------------------------------------------------------------------------------------------------------------------|
|                     |                                                                                          |                                                                                                                                                                                                                                                                                                                                                                      | teeth: 6<br>(3.4%) of<br>RPDs                                                                                                       |                                                                                                                  |
| Bergmann, 1971 [10] | Impaired retention: 6 (20.7%) of patients                                                | Fracture of lingual bar: 1 (3.5%) of patients.<br>Clasp fracture: 1 (3.5%) of patients                                                                                                                                                                                                                                                                               | Loss of tooth in the denture: 1 (3.5%) of patients                                                                                  | Crack in the base of one denture: 1 (3.5%) of patients                                                           |
| Bergmann, 1977 [11] | Impaired retention: 2-4 years: 10 (35.7%) of patients; 4-6 years: 11 (39.3%) of patients | Clasp adjustment: 32 (no percentage can be given because only the number of patients followed up (n=28) is given, but not the number of prostheses followed up or the number of follow-up treatments per patient or prosthesis). Clasp replacement: 5. New lower partial dentures due to fracture of the casting: 1. Minor repairs of the partial denture casting: 2 | Renewals of porcelain or acrylic facings due to fracture or abrasion: 3. Dentures requiring replacement of teeth due to abrasion: 3 | Denture base adjustments: 16<br>Rebasings or relinings and carried out in conjunction with occlusal grinding: 19 |
| Bergmann, 1982 [12] |                                                                                          | Remade because of framework fracture: 2 (no percentage can be given because only the number of patients followed up (n=27) is given, but not the number of prostheses                                                                                                                                                                                                | Exchange of facings: 5<br>Minor repairs of the acrylic part of the denture: 44                                                      | Rebasing, including grinding (occlusal correction): 28                                                           |

|                            |                      |                                                                                                                                                                                                                                                |                                                      |                  |                      |
|----------------------------|----------------------|------------------------------------------------------------------------------------------------------------------------------------------------------------------------------------------------------------------------------------------------|------------------------------------------------------|------------------|----------------------|
|                            |                      | followed up or the number of follow-up treatments per patient or prosthesis). Re-made because of loss of framework fit: 7. Re-made because of instability caused by poor fit of the framework and denture base: 3. Repair of framework: 2      |                                                      |                  |                      |
| Budtz-Jørgensen, 1987 [14] |                      | Repair of framework: 2 (no percentage can be given, as only the number of findings/measures is given and not a number of patients or prosthesis affected). Adjustment of sublingual bar: 10. Fracture of major connector: 2. Clasp fracture: 2 | Minor repairs of the acrylic part of the dentures: 8 | Relining: 5      | Occlusal grinding: 5 |
| Budtz-Jørgensen, 1990 [15] |                      | Clasp fractures: 4 ((no percentage can be given, as only the number of findings/measures is given and not a number of patients or prostheses affected). Major repair of framework: 6                                                           | Denture failures: 10                                 | Relining: 7      |                      |
| Ishida, 2017 [19]          | Loss of cementation: | Complications of the retainer: 12 (6.0%) of                                                                                                                                                                                                    | Complications of                                     | Complications of |                      |

|                     |                                                                                                        |                                                                                                                                                                                                    |                                                                                                   |                                                                                                                                                                                              |
|---------------------|--------------------------------------------------------------------------------------------------------|----------------------------------------------------------------------------------------------------------------------------------------------------------------------------------------------------|---------------------------------------------------------------------------------------------------|----------------------------------------------------------------------------------------------------------------------------------------------------------------------------------------------|
|                     | 15 (3.8%) of the abutment teeth. This corresponded to 15 (28.3%) of 53 complications of abutment teeth | RPDs. This corresponded to 12 (11.1%) of 108 complications of RPDs                                                                                                                                 | artificial tooth: 15 (7.5%) of RPDs. This corresponded to 15 (13.9%) of 108 complications of RPDs | dentures base: 67 (33.7%) of RPDs. This corresponded to 67 (62%) of 108 complications of RPDs                                                                                                |
| Kapur, 1989 [20]    |                                                                                                        | Broken or distorted frameworks or lost dentures: 11 (9.3%) of RPDs                                                                                                                                 |                                                                                                   | Rebasing: 23 (19.5%) der RPDs                                                                                                                                                                |
| Kapur, 1994 [21]    |                                                                                                        | Remake because of broken metal framework: 1 (1.7%) of the RPDs with circumferential design. Remake because of bent: 3 (5.1%) of RPDs with circumferential design; 3 (5.1%) of RPDs with bar design |                                                                                                   | Rebasing: 15 (25.4%) of RPDs w/ circumferential design; 8 (13.6%) of RPDs w/ bar design. Rebased and/or remade: 7 (11.9%) of RPDs w/ circumferential design; 7 (11.9%) of RPDs w/ bar design |
| Kurosaki, 2021 [22] |                                                                                                        |                                                                                                                                                                                                    | Fracture of the superstructure                                                                    | Loss of prosthesis because of                                                                                                                                                                |

|                       |                                                            |                                                                                                                                                                                                                                                                                                                                   |                                                                                                                                                            |                                                                                                             |                                                                                                                                                     |
|-----------------------|------------------------------------------------------------|-----------------------------------------------------------------------------------------------------------------------------------------------------------------------------------------------------------------------------------------------------------------------------------------------------------------------------------|------------------------------------------------------------------------------------------------------------------------------------------------------------|-------------------------------------------------------------------------------------------------------------|-----------------------------------------------------------------------------------------------------------------------------------------------------|
|                       |                                                            |                                                                                                                                                                                                                                                                                                                                   | veneering material: 0 (0%) of patients                                                                                                                     | extraction of abutment teeth, fracture of the denture base, discomfort from using RPD: 15 (75%) of patients |                                                                                                                                                     |
| Nisser, 2022 [25]     |                                                            | Fracture of the framework: 3 (1.7%) of RPDs. Fracture of clasps leading to failure: 9 (5.2%) of the RPDs. Fracture of clasps not leading to failure: 8 (4.7%) of RPDs. Combined complications: Fracture of clasps and fracture of acrylic teeth: 2 (1.2%) of RPDs; fracture of clasps and loss of natural teeth: 1 (0.6%) of RPDs | Loss/fracture of prosthetic acrylic teeth: 5 (2.9%) of RPDs. Combined complications: loss of natural teeth and fracture of acrylic teeth: 2 (1.2%) of RPDs | Need for relining of the prosthesis base: 4 (2.3%) of RPDs                                                  | Failure because of poor fit and adaptation: 24 (14.0%) of RPDs. Need for addition of more prosthetic elements, leading to failure: 1 (0.6%) of RPDs |
| Pihlaja, 2015 [26]    | Good retention (= resisted replacement): 17 (100%) of RPDs | Crown of abutment teeth with fracture of occlusal rest seat: 1 (2.7%) of abutment teeth                                                                                                                                                                                                                                           | Fracture of the veneering porcelain: 2 (11.8%) of RPDs                                                                                                     |                                                                                                             |                                                                                                                                                     |
| Stegelmann, 2012 [33] |                                                            | Fracture of metal framework: 5 (7.4%) of RPDs                                                                                                                                                                                                                                                                                     | Repair of facing: 3 (4.4%) of RPDs                                                                                                                         | Fracture of the denture base: 2 (2.9%) of the                                                               |                                                                                                                                                     |

|                                          |                                                                                                                                                                                                          |                                                                                                                                                                                                                                                                        |                                                                                                            |
|------------------------------------------|----------------------------------------------------------------------------------------------------------------------------------------------------------------------------------------------------------|------------------------------------------------------------------------------------------------------------------------------------------------------------------------------------------------------------------------------------------------------------------------|------------------------------------------------------------------------------------------------------------|
|                                          |                                                                                                                                                                                                          | RPDs.<br>Cracks in<br>denture base:<br>1 (1.5%) of<br>RPDs                                                                                                                                                                                                             |                                                                                                            |
| Thom-<br>ason,<br>2007 [37]              | Distortion, removable<br>partial denture frac-<br>ture, loss of tooth: 10<br>(5.7%) of the 175 treat-<br>ment needs. Removable<br>partial denture adjust-<br>ments: 60 (34.3%) of the<br>treatment needs |                                                                                                                                                                                                                                                                        |                                                                                                            |
| Van-<br>zeveren,<br>Part I,<br>2003 [38] | Fracture of the metal<br>saddle: 7 (2.4%) of<br>RPDs                                                                                                                                                     | Repair of<br>saddles and<br>artificial<br>teeth: 7<br>(2.4%) of<br>RPDs. Refix-<br>ation of a<br>tooth: 18<br>(6.2%) of<br>RPDs. Re-<br>placement of<br>a tooth: 4<br>(1.4%) of<br>RPDs. Re-<br>placement of<br>the saddle<br>and the<br>teeth: 5<br>(1.7%) of<br>RPDs | Relines mate-<br>rialized: 30<br>(10.3%) of<br>RPDs. Re-<br>lines recom-<br>mended: 32<br>(11%) of<br>RPDs |

|                                          |                                                                                                                                                                                                                                                                                                                                                                                                                                      |                                                                                                                                                                                                                                                                                                                                                                                                                                                                      |
|------------------------------------------|--------------------------------------------------------------------------------------------------------------------------------------------------------------------------------------------------------------------------------------------------------------------------------------------------------------------------------------------------------------------------------------------------------------------------------------|----------------------------------------------------------------------------------------------------------------------------------------------------------------------------------------------------------------------------------------------------------------------------------------------------------------------------------------------------------------------------------------------------------------------------------------------------------------------|
| Vanzeve<br>ren, Part<br>II, 2003<br>[39] | Fractures of the reten-<br>tive systems: 27 (3.4%)<br>of the abutment teeth                                                                                                                                                                                                                                                                                                                                                          |                                                                                                                                                                                                                                                                                                                                                                                                                                                                      |
| Ver-<br>meulen,<br>1996 [40]             | Survival related to frac-<br>ture of prosthetic<br>framework: extension<br>base: upper after 5<br>years: $84 \pm 5\%$ ; upper<br>after 10 years: $65 \pm 9\%$ ;<br>lower after 5 years: $86 \pm 2\%$ ; lower after 10<br>years: $72 \pm 4\%$ ; tooth-<br>supported base: upper<br>after 5 years: $89 \pm 3\%$ ;<br>upper after 10 years: $73 \pm 5\%$ ; upper after 5<br>years: $82 \pm 4\%$ ; upper<br>after 10 years: $56 \pm 7\%$ | Survival re-<br>lated to ad-<br>justment<br>denture base:<br>extension<br>base: upper<br>after 5 years:<br>$60 \pm 6\%$ ; up-<br>per after 10<br>years: $40 \pm 9\%$ ; lower af-<br>ter 5 years:<br>$65 \pm 3\%$ ;<br>lower after<br>10 years: $41 \pm 4\%$ ; tooth-<br>supported<br>base: upper<br>after 5 years:<br>$82 \pm 3\%$ ; up-<br>per after 10<br>years: $55 \pm 6\%$ ; Lower<br>after 5 years:<br>$75 \pm 4\%$ ;<br>lower after<br>10 years: $55 \pm 7\%$ |

---

Wagner, Retention:  
2000 [41] 1-5 N (mean  
2.3 N)

---

**Table S4.** Summary of the results of the included studies: attachment-retained RPDs.

23

| Author, year        | Retention of prosthesis           | Retention loss of anchor crowns (decementation)                                                                                                                                                            | Fracture of the framework (including the anchorage elements and their repair)                                                                                                                                                                                                                                                                                                                   | Fracture/repair of denture teeth or veneering                                                                                                                                                                     | Fracture/repair of acrylic denture base/saddles                                                                      | Relining/rebasing                                                                                                              | Other failures/ complications |
|---------------------|-----------------------------------|------------------------------------------------------------------------------------------------------------------------------------------------------------------------------------------------------------|-------------------------------------------------------------------------------------------------------------------------------------------------------------------------------------------------------------------------------------------------------------------------------------------------------------------------------------------------------------------------------------------------|-------------------------------------------------------------------------------------------------------------------------------------------------------------------------------------------------------------------|----------------------------------------------------------------------------------------------------------------------|--------------------------------------------------------------------------------------------------------------------------------|-------------------------------|
| Heydecke, 2003 [18] |                                   | Decementation: after in mean 27 months: 4 (7.3%) of RPDs; after 59 ± 11 months: 7 (12.7%) of the RPDs (both percentages refer to the number (n=55) of prostheses reexamined after an average of 27 months) | Fracture of the metal: after in mean 27 months: 2 (3.6%) of RPDs; after 59 ± 11 months: 2 (3.6%) of RPDs. Need to replace a retention element (15 due to spring fractures): after in mean 27 months: 14 (25.5%) of RPDs; after 59 ± 11 months: 20 (36.4%) of RPDs. Fractures or corrosion of the attachment: after in mean 27 months: 3 (5.5%) of RPDs; after 59 ± 11 months: 6 (10.9%) of RPDs | Chipped denture teeth: after in mean 27 months: 4 (7.3%) of RPDs; after 59 ± 11 months: 8 (14.5%) of RPDs. Chipped facings: after in mean 27 months: 5 (9.1%) of the RPDs; after 59 ± 11 months: 5 (9.1%) of RPDs | Fracture of the denture base: after in mean 27 months: 4 (7.3%) of RPDs; after 59 ± 11 months: 6 (10.9%) of the RPDs | Relining because of bone resorption: after in mean 27 months: 10 (18.2%) of the RPDs; after 59 ± 11 months: 10 (18.2%) of RPDs |                               |
| Schmitt 2011 [28]   | Attachment screw activation: RPDs | Decementation: RPDs with                                                                                                                                                                                   |                                                                                                                                                                                                                                                                                                                                                                                                 | Fracture of the ceramic                                                                                                                                                                                           |                                                                                                                      |                                                                                                                                |                               |

|                                                                                                                                                                                                                                                                                                                                                                                                                                                                                                       |                                                                                                                                                                                                      |                                                                                                                                                 |
|-------------------------------------------------------------------------------------------------------------------------------------------------------------------------------------------------------------------------------------------------------------------------------------------------------------------------------------------------------------------------------------------------------------------------------------------------------------------------------------------------------|------------------------------------------------------------------------------------------------------------------------------------------------------------------------------------------------------|-------------------------------------------------------------------------------------------------------------------------------------------------|
| <p>with extracoronal attachment with interchangeable plastic inserts that are adjustable with activation screw: 20 (46.5%) of attachments; RDPs with spring bolt attachments: 3 (37.5%) of attachments. Change of plastic insert of RPD with extracoronal attachment with interchangeable plastic inserts that are adjustable with activation screw: 17 (39.5%) of attachments. Irreversible mechanical wear of attachment of the male part of the spring bolt attachment: 4 (50%) of attachments</p> | <p>extracoronal attachment with interchangeable plastic inserts that are adjustable with activation screw): 1 (2.3%) of attachments; RDPs with spring bolt attachments: 1 (12.5%) of attachments</p> | <p>veneering: RPDs with spring bolt attachments: 3 (37.5%) of attachments</p>                                                                   |
| <p>Stegelmann, 2012 [33]</p>                                                                                                                                                                                                                                                                                                                                                                                                                                                                          | <p>Fracture of metal framework: 3 (2.2%) of RPDs</p>                                                                                                                                                 | <p>Repair of a facing: 5 (3.7%) of RPDs<br/>Fracture of the denture base: 5 (3.7%) of RPDs.<br/>Crack in the denture base: 1 (0.7%) of RPDs</p> |

|                    |                                                                                                                |                                                                                                   |                                                                                                                                                         |                                                                                                                                                                                                           |                                                                                                           |                                                                                            |                                                                                                         |
|--------------------|----------------------------------------------------------------------------------------------------------------|---------------------------------------------------------------------------------------------------|---------------------------------------------------------------------------------------------------------------------------------------------------------|-----------------------------------------------------------------------------------------------------------------------------------------------------------------------------------------------------------|-----------------------------------------------------------------------------------------------------------|--------------------------------------------------------------------------------------------|---------------------------------------------------------------------------------------------------------|
| Wolfart, 2012 [44] | Change of plastic insert: 32 (39.5%) of RPDs, which corresponded to 34 treatments (7.4% of all 459 treatments) | Decementation: 13 (16%) of the RPDs, which corresponded to 19 treatments (4.1% of all treatments) | Fracture of framework: 0 (0%) of the RPDs. Repair of frameworks or minor connector: 5 (6.2%), which corresponded to treatments (1.3% of all treatments) | Facing renewed: 12 (14.8%) of RPDs, which corresponded to 15 treatments (3.3% of all treatments). Renewal of acrylic teeth: 4 (4.9%) of RPDs, which corresponded to 5 treatments (1.1% of all treatments) | Repair of denture base: 1 (1.2%) of the RPDs, which corresponded to 2 treatments (0.4% of all treatments) | Relining: 27 (33.3%) of RPDs, which corresponded to 29 treatments (6.3% of all treatments) | Occlusal adjustment: 7 (8.6%) of the RPDs, which corresponded to 12 treatments (2.6% of all treatments) |
|                    |                                                                                                                |                                                                                                   |                                                                                                                                                         |                                                                                                                                                                                                           |                                                                                                           |                                                                                            |                                                                                                         |

**Table S4.** Summary of the results of the included studies: conical double-crown-retained RPDs.

26

| Author, year        | Retention of prosthesis                                                     | Retention loss of anchor crowns (decementation)                        | Fracture of the frame-work (including the anchorage elements and their repair) | Fracture/repair of denture teeth or veneering                                       | Fracture/repair of acrylic denture base/saddles                                                                                                          | Relining/re-basing | Other failures/ complications           |
|---------------------|-----------------------------------------------------------------------------|------------------------------------------------------------------------|--------------------------------------------------------------------------------|-------------------------------------------------------------------------------------|----------------------------------------------------------------------------------------------------------------------------------------------------------|--------------------|-----------------------------------------|
| Behr, 2000 [7]      |                                                                             | Decementation: 8 (18.6%) of RPDs                                       | Fracture of the metal framework: 3 (7%) of RPDs                                | Loss of facings: 4 (9,3%) of RPDs. Fracture of artificial teeth: 3 (7%) of the RPDs | Fracture of resin framework: 2 (4.7%) of RPDs                                                                                                            |                    | Fracture of soldering: 1 (2,3%) of RPDs |
| Behr, 2009 [8]      |                                                                             | Decementation: 33 (53.2%) of RPDs                                      |                                                                                |                                                                                     |                                                                                                                                                          |                    |                                         |
| Bergmann, 1996 [13] | Marked retention; extremely marked retention (grades 2-3): 13 (72%) of RPDs | Decementation: 8 (44.4%) of patients, 13 (16.7%) of the abutment teeth |                                                                                |                                                                                     | Acrylic resin denture repairs: 17 (no percentage can be given because the authors did not specify how many prostheses or patients this number refers to) |                    |                                         |
| Ericson, 1990 [16]  | Marked retention; extremely marked retention (grades 2-3):                  |                                                                        |                                                                                | Cervical cracks in the veneering material: 23 (24%) of the secondary crowns         |                                                                                                                                                          |                    |                                         |

|                    |                                                |                                                                                                                                                                                                                                                                                             |
|--------------------|------------------------------------------------|---------------------------------------------------------------------------------------------------------------------------------------------------------------------------------------------------------------------------------------------------------------------------------------------|
| 21 (87.5%) of RPDs |                                                |                                                                                                                                                                                                                                                                                             |
| Hahnel, 2012 [17]  |                                                | Failure of veneering: 17 (27.9%) of RPDs                                                                                                                                                                                                                                                    |
| Scholz, 2010 [29]  |                                                | Estimated fracture rate after 5 years: 20.6% (14.2-26.9%) (percentages refer to Kaplan-Meier estimators with 95% confidence intervals); anterior teeth 17.9% (11.8-24%); premolars 26.4% (7.7-45.1%); molars 8.3% (0-22.3%). Estimated discoloration rate after 5 years: 16.3% (11.2-21.4%) |
| Stober, 2012 [34]  | Decementation: 7 (6.3%) of the primary crowns  | Loss/fracture of facings: 10 (8.9%) of the primary crowns                                                                                                                                                                                                                                   |
| Stober, 2015 [35]  | Decementation: 10 (8.9%) of the primary crowns | Loss/fracture of facings: 30 (26.8%) of the primary crowns                                                                                                                                                                                                                                  |
| Wagner, 2000 [41]  | Retention: 1-10 N (mean 4.9 N)                 |                                                                                                                                                                                                                                                                                             |

**Table S4.** Summary of the results of the included studies: electroplated double-crown-retained RPDs.

| Author, year           | Retention of prosthesis                               | Retention loss of anchor crowns (decementation)                      | Fracture of the framework (including the anchorage elements and their repair) | Fracture/repair of denture teeth or veneering                                                                                                                                                                                                                                                                                                                                                                                             | Fracture/repair of acrylic denture base/saddles                                                                             | Relining/re-basing                                                                                                     | Other failures/ complications                                                            |
|------------------------|-------------------------------------------------------|----------------------------------------------------------------------|-------------------------------------------------------------------------------|-------------------------------------------------------------------------------------------------------------------------------------------------------------------------------------------------------------------------------------------------------------------------------------------------------------------------------------------------------------------------------------------------------------------------------------------|-----------------------------------------------------------------------------------------------------------------------------|------------------------------------------------------------------------------------------------------------------------|------------------------------------------------------------------------------------------|
| Schwindling, 2017 [32] |                                                       | Decementation: 4 (14.3%) of RPDs with Cobalt-chromium primary crowns |                                                                               | Veneer failure: 5 (18.2%) of RPDs with zirconia primary crowns; 5 (17.9%) of RPDs with Cobalt-chromium primary crowns. Combined complications: veneer failure and fracture of a primary crown: 1 (3.7%) of RPDs with zirconia primary crowns; veneer failure and need for relining: 1 (3.6%) of RPDs with Cobalt-chromium primary crowns. Veneer fracture and denture base fracture: 1 (3.6%) of RPDs with Cobalt-chromium primary crowns | Denture base fracture: 3 (11.1%) of RPDs with zirconia primary crowns; 2 (7.1%) of RPDs with Cobalt-chromium primary crowns | Need for relining: 1 (3.7%) of RPDs with zirconia primary crowns; 2 (7.1%) of RPDs with Cobalt-chromium primary crowns | Failure of electroplated structure: 1 (3.6%) of RPDs with Cobalt-chromium primary crowns |
| Stober, 2012 [34]      | Remade because of loss of retention: 1 (3.3%) of RPDs | Decementation: 6 (5.7%) of primary crowns                            |                                                                               | Losses or fractures of facings: 16 (15.2%) of primary crowns                                                                                                                                                                                                                                                                                                                                                                              |                                                                                                                             |                                                                                                                        |                                                                                          |

|                   |                                                                                          |                                            |                                                              |
|-------------------|------------------------------------------------------------------------------------------|--------------------------------------------|--------------------------------------------------------------|
| Stober, 2015 [35] | Remade because of combination of loss of retention and loss of facings: 1 (3.3%) of RPDs | Decementation: 10 (9.5%) of primary crowns | Losses or fractures of facings: 33 (31.4%) of primary crowns |
|-------------------|------------------------------------------------------------------------------------------|--------------------------------------------|--------------------------------------------------------------|

Table S4. Summary of the results of the included studies: double-crown-retained RPDs.

29

| Author, year (specifics anchoring form)       | Retention of prosthesis | Retention loss of anchor crowns (decementation)                                                                                                  | Fracture of the framework (including the anchorage elements and their repair) | Fracture/repair of denture teeth or veneering                                                         | Fracture/repair of acrylic denture base/saddles | Relining/ rebasing | Other failures/ complications         |
|-----------------------------------------------|-------------------------|--------------------------------------------------------------------------------------------------------------------------------------------------|-------------------------------------------------------------------------------|-------------------------------------------------------------------------------------------------------|-------------------------------------------------|--------------------|---------------------------------------|
| Behr, 2000 (parallel-sided double crowns) [7] |                         | Decementation: 19 (26%) of RPDs                                                                                                                  | Fracture of metal framework: 2 (2.7%) of RPDs                                 | Loss of facings: 0 (0%) of RPDs. Fracture of artificial teeth: 4 (5.5%) of RPDs                       |                                                 |                    | Fracture of soldering: 0 (0%) of RPDs |
| Behr, 2009 [8]                                |                         | Decementation: 67 (21.3%) of parallel-sided telescopic crowns with clearance fit; 64 (32%) of parallel-sided telescopic crowns with friction fit |                                                                               |                                                                                                       |                                                 |                    |                                       |
| Hahnel, 2012 [17]                             |                         |                                                                                                                                                  |                                                                               | Failure of veneering: parallel-sided telescopic with clearance fit: 14 (4.4%) of RPDs; parallel-sided |                                                 |                    |                                       |

|                                                                  |                                                                                                                                                                                             |                                                                                                                                                 |                                                                                                         |                                                                                                                                                                                                                                 |
|------------------------------------------------------------------|---------------------------------------------------------------------------------------------------------------------------------------------------------------------------------------------|-------------------------------------------------------------------------------------------------------------------------------------------------|---------------------------------------------------------------------------------------------------------|---------------------------------------------------------------------------------------------------------------------------------------------------------------------------------------------------------------------------------|
|                                                                  |                                                                                                                                                                                             | telescopic with friction fit:<br>14 (7%) of RPDs                                                                                                |                                                                                                         |                                                                                                                                                                                                                                 |
| Ishida, 2017 [19]                                                |                                                                                                                                                                                             | Decementation: 20 (13.8%) of abutment teeth. This corresponded to 20 (76.9%) of 26 complications of abutment teeth                              | Complications of retainer: 3 (5.8%) of RPDs. This corresponded to 3 (14.3%) of 21 complications of RPDs | Complications of artificial tooth: 5 (9.6%) of RPDs. This corresponded to 5 (23.8%) of complications of RPDs<br><br>Complications of denture base: 10 (19.2%) of RPDs. This corresponded to 10 (47.6%) of complications of RPDs |
| Mock, 2005 (parallel-sided double crowns with friction fit) [23] | Objectifiable retention loss: 86% of satisfied patients; 39% of less satisfied patients (no figure can be given for the number because only the percentage is given and no reference value) | Decementation: 34 (37%) of patients                                                                                                             |                                                                                                         |                                                                                                                                                                                                                                 |
| Nickenig, 1995 (almost exclusively cylinder telescopic) [24]     |                                                                                                                                                                                             | Decementation: 39 (9.7%) of primary crowns, corresponding to $10.0 \pm 3.3\%$ of treatment measures at 5 years and $14.1 \pm 5.1\%$ at 8 years. |                                                                                                         | Damage to veneering: 25 (6.2%) of the primary crowns, corresponding to $4.7 \pm 2.6\%$ of post-treatment measures after 5 years and $7.1 \pm 3.7\%$ after 8 years.                                                              |

|                                                                                                         |                                                                                           |                                                                                                              |                                                                                                                                                                                                 |                                                                                                                                                                                                                                                                      |                                                                                        |                                                                               |                                                                                         |
|---------------------------------------------------------------------------------------------------------|-------------------------------------------------------------------------------------------|--------------------------------------------------------------------------------------------------------------|-------------------------------------------------------------------------------------------------------------------------------------------------------------------------------------------------|----------------------------------------------------------------------------------------------------------------------------------------------------------------------------------------------------------------------------------------------------------------------|----------------------------------------------------------------------------------------|-------------------------------------------------------------------------------|-----------------------------------------------------------------------------------------|
| Rehmann, 2006 (cylinder telescopic RDPs, in a few cases (5.4%) combined with clasps on the molars) [27] | Improved friction: 41 (7.4%) of RPDs. This corresponded to 48 (2%) of all 2182 treatments | Recementation: 114 (21%) of RPDs. This corresponded to 216 (10%) of all treatment                            | Metal base repair: 14 (2.5%) of RPDs. This corresponded to 20 (1%) of all treatments. Primary crown or framework remake/repair: 39 (7%) of RPDs. This corresponded to 48 (2%) of all treatments | Facing repair: 149 (27%) of RPDs. This corresponded to 467 (22%) of all treatments. Resetting up a tooth: 63 (11.4%) of RPDs. This corresponded to 75 (3%) of all treatments. Reinserting a tooth: 61 (11%) of RPDs. This corresponded to 146 (7%) of all treatments | Acrylic base repair: 41 (7.4%) of RPDs. This corresponded to 54 (2%) of all treatments | Relining: 193 (35%) of RPDs. This corresponded to 347 (16%) of all treatments | Removing high spots: 210 (38%) of RPDs. This corresponded to 56 (26%) of all treatments |
| Schwindling, 2014 (telescopic, conical, resilient) [31]                                                 |                                                                                           | Recementation: 40 (34.2%) of RPDs/47 (12.2%) of abutment teeth; 14 (35%) of RPDs with repeated recementation | Cracks or fractures in prothesis framework or base: 20 (17.1%) of RPDs                                                                                                                          | Reveneering: 13 (11.1%) of RPDs; 12 (92.3%) RPDs with multiple reveeneering                                                                                                                                                                                          |                                                                                        | Relining: 14 (12%) of RPDs                                                    |                                                                                         |
| Stober, 2020 (telescopic) [36]                                                                          |                                                                                           |                                                                                                              |                                                                                                                                                                                                 | Mean occlusal wear of RPD: 91 ± 85 µm (maximum: 329 ± 204 µm)                                                                                                                                                                                                        |                                                                                        |                                                                               |                                                                                         |
| Wagner, 2000 (conical crowns on anterior teeth and clasps on molars combined in a single denture) [41]  | Retention: 1-10 N (mean: 5 N)                                                             |                                                                                                              |                                                                                                                                                                                                 |                                                                                                                                                                                                                                                                      |                                                                                        |                                                                               |                                                                                         |
| Wagner, 2000 (all combined: clasp retained, conical crowns, conical crowns on anterior teeth)           |                                                                                           |                                                                                                              | Fractures in metal: 8 (11.1%) of all RPDs                                                                                                                                                       | Facing lost: 16 (22.2%) of all RPDs. Facing discolored: 14 (19.4%) of all RPDs                                                                                                                                                                                       | Fractures in acrylic: 12 (16.7%) of all RPDs                                           |                                                                               |                                                                                         |

|                                                                                                             |                                                                                                                                                               |                                                                                        |                                                                                                |                                                                                                                                                                                                                                                                                              |                                                                                          |                                                                                   |                                                                                                               |
|-------------------------------------------------------------------------------------------------------------|---------------------------------------------------------------------------------------------------------------------------------------------------------------|----------------------------------------------------------------------------------------|------------------------------------------------------------------------------------------------|----------------------------------------------------------------------------------------------------------------------------------------------------------------------------------------------------------------------------------------------------------------------------------------------|------------------------------------------------------------------------------------------|-----------------------------------------------------------------------------------|---------------------------------------------------------------------------------------------------------------|
| and clasps on molars combined in a single denture) [41]                                                     |                                                                                                                                                               |                                                                                        |                                                                                                |                                                                                                                                                                                                                                                                                              |                                                                                          |                                                                                   |                                                                                                               |
| Wenz, 2001 (Marburger double crowns with TC-SNAP system) [42]                                               |                                                                                                                                                               |                                                                                        | Fracture of metal frame-work: 0 (0%) of RPDs                                                   |                                                                                                                                                                                                                                                                                              |                                                                                          |                                                                                   |                                                                                                               |
| Widbom, 2004 (double-crown-retained with various numbers of replaceable snap attachments (Ipso-clips)) [43] |                                                                                                                                                               | Abutment tooth fracture/loss of coping cement bond: 22 (6%) of the abutment teeth      | Fracture of framework: 4 (5.3%) of RPDs                                                        |                                                                                                                                                                                                                                                                                              |                                                                                          |                                                                                   |                                                                                                               |
| Wöstmann, 2007 (cylinder telescopic RPDs, in a few cases (5.4%) combined with clasps on the molars) [45]    | Increase in friction by apposition of alloy by laser welding into the secondary crown: 41 (7.4%) of RPDs. This corresponded to 48 (3%) of all 1626 treatments | Recementation: 114 (20.6%) of RPDs. This corresponded to 216 (13.3%) of all treatments | Repair of metal framework: 14 (2.5%) of RPDs. This corresponded to 20 (1.2%) of all treatments | Facing repair: 149 (26.9%) of RPDs. This corresponded to 467 (28.7%) of all treatments. Reattaching a denture tooth: 61 (11%) of RPDs. This corresponded to 146 (8.9%) of all treatments. Resetting up of denture teeth: 63 (11.4%) of RPD. This corresponded to 75 (4.6%) of all treatments | Acrylic base repair: 41 (7.4%) of RPDs. This corresponded to 54 (3.3%) of all treatments | Relining: 193 (34.8%) of RPDs. This corresponded to 347 (21.3%) of all treatments | Remake/repair of primary or secondary crowns: 39 (7%) of RPDs. This corresponded to 48 (3%) of all treatments |
| Yoshino, 2020 [46]                                                                                          |                                                                                                                                                               |                                                                                        |                                                                                                | Need to remake because of prosthetic tooth wear: 2 (0.9%) of the RPDs                                                                                                                                                                                                                        | Need to remake because of incompatibility of mucosal surface: 10 (4,7%) of RPDs          |                                                                                   |                                                                                                               |

|                                    |                                                                                                                                                                                                                                                                                                                                                                                   |                                                                                                                                                                                                                                                                             |                                                                                                                                                                                                                                                                                                                                                                                                                                        |                                                                                                                                                                                                                                                                                                |                                                                                                                                                                                                                                                                                                        |                                                                                                                                                                                                                                                                          |                                                                                                                                                                                                                                                                                                                                                                    |
|------------------------------------|-----------------------------------------------------------------------------------------------------------------------------------------------------------------------------------------------------------------------------------------------------------------------------------------------------------------------------------------------------------------------------------|-----------------------------------------------------------------------------------------------------------------------------------------------------------------------------------------------------------------------------------------------------------------------------|----------------------------------------------------------------------------------------------------------------------------------------------------------------------------------------------------------------------------------------------------------------------------------------------------------------------------------------------------------------------------------------------------------------------------------------|------------------------------------------------------------------------------------------------------------------------------------------------------------------------------------------------------------------------------------------------------------------------------------------------|--------------------------------------------------------------------------------------------------------------------------------------------------------------------------------------------------------------------------------------------------------------------------------------------------------|--------------------------------------------------------------------------------------------------------------------------------------------------------------------------------------------------------------------------------------------------------------------------|--------------------------------------------------------------------------------------------------------------------------------------------------------------------------------------------------------------------------------------------------------------------------------------------------------------------------------------------------------------------|
| Zierden, 2018 (double-crowns) [47] | Retention reduction Initial: 95 (26%) of 600 cases in non-precious metal alloy (NPMA) RPDs; 15 (6.4%) cases in precious metal alloy (PMA) RPDs; follow-up: 112 (9.8%) cases in NPMA RPDs; 27 (2.1%) cases in PMA RPDs. Increasing retention Initial: 6 (1.6%) cases in NPMA RPDs; 1 (0.4%) case in PMA RPDs; follow-up: 33 (2.9%) cases in NPMA RPDs; 68 (5.4%) cases in PMA RPDs | Recementation: initial maintenance intervention: 32 (8.7%) cases in non-precious metal alloy RPDs; 17 (7.3%) cases in precious metal alloy RPDs; maintenance intervention: 160 (14%) cases in non-precious metal alloy RPDs; 156 (12.3%) cases in precious metal alloy RPDs | Repair of metal framework: initial maintenance intervention: 0 (0%) case in non-precious metal alloy RPDs; 1 (0.4%) case in precious metal alloy RPDs; maintenance intervention: 57 (5%) cases in non-precious metal alloy RPDs; 45 (3.6%) cases in precious metal alloy RPDs. Renewal of metal framework: maintenance intervention: 16 (1.4%) cases for non-precious metal alloy RPDs; 26 (2.1%) cases for precious metal alloy RPDs. | New veneering of secondary crown: initial maintenance intervention: 8 (2.2%) cases in non-precious metal alloy RPDs; 17 (7.3%) cases in precious metal alloy RPDs; maintenance intervention: 102 (8.9%) cases in non-precious metal alloy RPDs; 138 (10.9%) cases in precious metal alloy RPDs | Adjustment/repair of acrylic material: initial maintenance intervention: 27 (7.4%) cases in non-precious metal alloy RPDs; 26 (11.1%) cases in precious metal alloy RPDs; maintenance intervention: 121 (10.6%) cases in non-precious metal alloy RPDs; 137 (10.8%) cases in precious metal alloy RPDs | Relining: initial maintenance intervention: 14 (3.8%) cases in non-precious metal alloy RPDs; 17 (7.3%) cases in precious metal alloy RPDs; maintenance intervention: 118 (10.4%) cases in non-precious metal alloy RPDs; 183 (14.4%) cases in precious metal alloy RPDs | Adjustment/ correction of occlusion Initial: 56 (15.3%) cases in NPMA RPDs; 52 (22.2%) cases in PMA RPDs; follow-up: 133 (11.6%) cases in NPMA RPDs; 188 (14.8%) cases in PMA RPDs. Manufacturing of new primary crowns Initial: 2 (0.6%) cases in NPMA alloy RPDs; 3 (1.3%) cases in PMA RPDs; follow-up: 9 (0.8%) cases in NPMA RPDs; 5 (0.4%) cases in PMA RPDs |
|------------------------------------|-----------------------------------------------------------------------------------------------------------------------------------------------------------------------------------------------------------------------------------------------------------------------------------------------------------------------------------------------------------------------------------|-----------------------------------------------------------------------------------------------------------------------------------------------------------------------------------------------------------------------------------------------------------------------------|----------------------------------------------------------------------------------------------------------------------------------------------------------------------------------------------------------------------------------------------------------------------------------------------------------------------------------------------------------------------------------------------------------------------------------------|------------------------------------------------------------------------------------------------------------------------------------------------------------------------------------------------------------------------------------------------------------------------------------------------|--------------------------------------------------------------------------------------------------------------------------------------------------------------------------------------------------------------------------------------------------------------------------------------------------------|--------------------------------------------------------------------------------------------------------------------------------------------------------------------------------------------------------------------------------------------------------------------------|--------------------------------------------------------------------------------------------------------------------------------------------------------------------------------------------------------------------------------------------------------------------------------------------------------------------------------------------------------------------|

Table S4. Summary of the results of the included studies: other RPDs (bars, etc.).

| Author, year<br>(specifics an-<br>choring form) | Retention<br>of prothe-<br>sis | Retention<br>loss of anchor<br>crowns (de-<br>cementation) | Fracture of the<br>framework (in-<br>cluding the an-<br>chorage elements<br>and their repair)                                                                                                                                                                                                                                                                                                                    | Fracture/re-<br>pair of den-<br>ture teeth or<br>veneering | Fracture/repair of<br>acrylic denture<br>base/saddles                                                                                                                                                                                                                                                                                                                                                                                            | Relining/re-<br>basing             | Other fail-<br>ures/ compli-<br>cations |
|-------------------------------------------------|--------------------------------|------------------------------------------------------------|------------------------------------------------------------------------------------------------------------------------------------------------------------------------------------------------------------------------------------------------------------------------------------------------------------------------------------------------------------------------------------------------------------------|------------------------------------------------------------|--------------------------------------------------------------------------------------------------------------------------------------------------------------------------------------------------------------------------------------------------------------------------------------------------------------------------------------------------------------------------------------------------------------------------------------------------|------------------------------------|-----------------------------------------|
| Schulte, 1980<br>(Swinglock-<br>RDP) [30]       |                                |                                                            | Repair of frame-<br>work: 4 (7.6%)<br>of RPDs                                                                                                                                                                                                                                                                                                                                                                    |                                                            |                                                                                                                                                                                                                                                                                                                                                                                                                                                  | Relining: 14<br>(26.4%) of<br>RPDs |                                         |
| Vermeulen,<br>1996 [40]                         |                                |                                                            | Survival related<br>to fracture of<br>prosthetic frame-<br>work: extension<br>base: upper after<br>5 years: $84 \pm 9\%$ ;<br>lower after 5<br>years: $80 \pm 5\%$ ;<br>lower after 10<br>years: $64 \pm 8\%$<br>tooth-supported<br>base: upper after<br>5 years: $88 \pm 8\%$ ;<br>upper after 10<br>years: $59 \pm 18\%$ ;<br>lower after 5<br>years: $84 \pm 5\%$ ;<br>lower after 10<br>years: $63 \pm 10\%$ |                                                            | Survival related<br>to adjustment<br>denture base: ex-<br>tension base: up-<br>per after 5 years:<br>$72 \pm 11\%$ ; upper<br>after 10 years: $36 \pm 17\%$ ; lower after<br>5 years: $29 \pm 5\%$ ;<br>lower after 10<br>years: $10 \pm 5\%$<br>tooth-supported<br>base: upper after<br>5 years: $83 \pm 9\%$ ;<br>upper after 10<br>years: $66 \pm 17\%$ ;<br>lower after 5<br>years: $89 \pm 4\%$ ;<br>lower after 10<br>years: $65 \pm 10\%$ |                                    |                                         |
